# Supplementary material for: Microwave-assisted-demulsification–dispersive liquid–liquid microextraction coupled with gas chromatography–mass spectrometry for the determination of PAHs in water
Source: Royal Society of Chemistry journal article supplement (doi:10.1039/c8ay01794h), 2018-01-01
Supplement: c8ay01794h1.pdf [file c8ay01794h1.pdf]

Supporting information for

**Microwave-assisted-demulsification dispersive liquid-liquid microextraction coupled with gas chromatography-mass spectrometry for the determination of PAHs in water**

Xiajun Wang<sup>a</sup>, Jing Nie<sup>a,b</sup>, Guowei Yu<sup>a</sup>, Peng Wang<sup>a</sup>, Zuguang Li<sup>a\*</sup>, Mawrong Lee<sup>c</sup>

---

<sup>a</sup>. *College of Chemical Engineering, Zhejiang University of Technology, Hangzhou, Zhejiang Province 310014, P.R.China.*

<sup>b</sup>. *Institute of Quality and Standards for Agricultural Products, Zhejiang Academy of Agricultural Sciences, Hangzhou 310021, P.R.China.*

<sup>c</sup>. *Department of Chemistry, National Chung-Hsing University, Taichung, Taiwan, 40227.*

*\*Address for correspondence:*

*College of Chemical Engineering, Zhejiang University of Technology,  
No. 18, Chaowang Road, Xiacheng District, Hangzhou, Zhejiang Province  
310014, P.R.China;*

*Tel.: (86)-571-88320306, Fax: (86)-571-88320238,*

*E-mail: lzg@zjut.edu.cn*

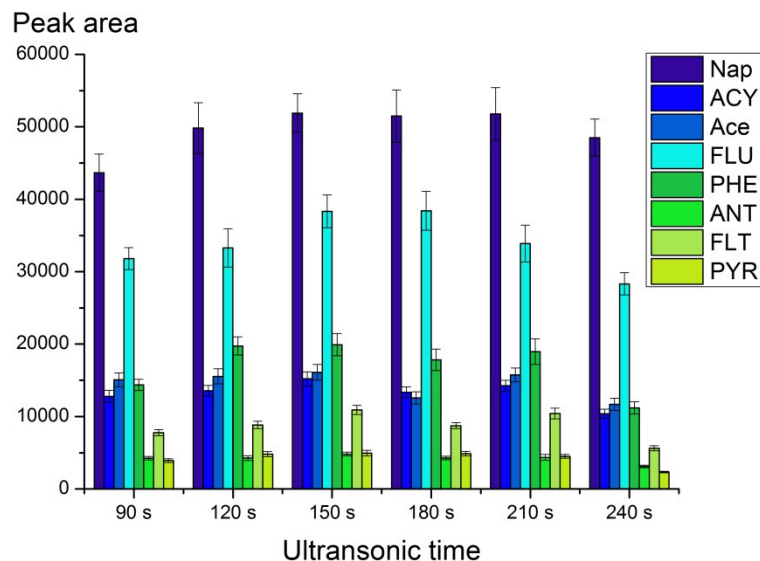

Fig. S1 Effect of ultrasound time on the extraction of 8 PAHs (n=3). Extraction conditions: extraction solvent (toluene) volume, 80  $\mu$ L; microwave power, 500 W; microwave time, 30 s; salt concentration, 0% of NaCl (w/v). (Nap, ACY, Ace, FLU, PHE, ANT, FLT, PYR is short for naphthalene, acenaphthylene, acenaphthene, fluorene, phenanthrene, anthracene, fluoranthene, pyrene, respectively.)

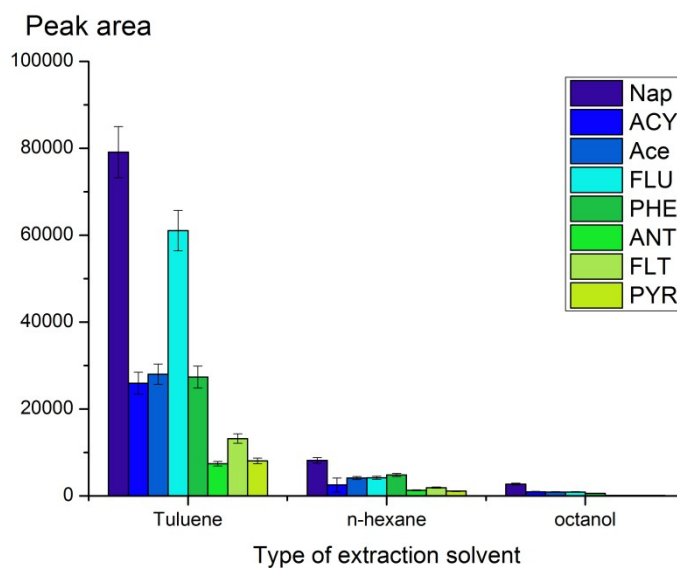

Fig. S2 Effect of type of extraction solvent on the extraction of 8 PAHs (n=3). Extraction conditions: ultrasound time, 150 s; microwave power, 500 W; microwave time, 30 s; the final volume of extraction solvent, 35-37  $\mu$ L; salt concentration, 0% of NaCl (w/v). (Nap, ACY, Ace, FLU, PHE, ANT, FLT, PYR is short for naphthalene, acenaphthylene, acenaphthene, fluorene, phenanthrene, anthracene, fluoranthene, pyrene, respectively.)

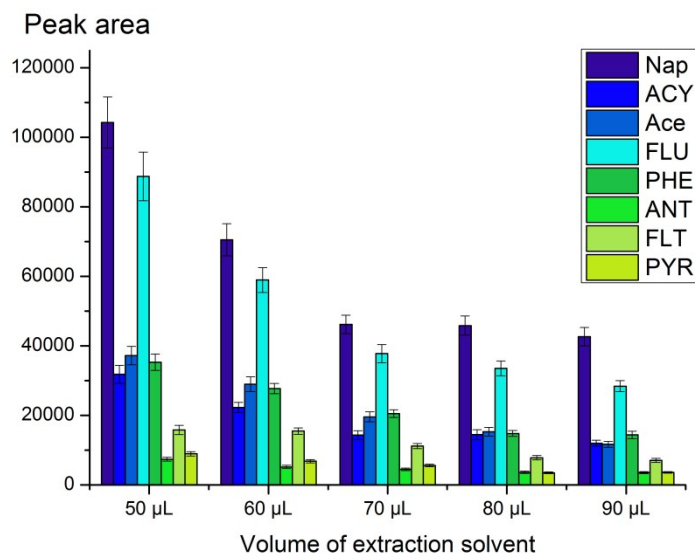

Fig. S3 Effect of volume of the extraction solvent on the extraction of 8 PAHs (n=3). Extraction conditions: extraction solvent, toluene; ultrasound time, 150 s; microwave power, 500 W; microwave time, 30 s; salt concentration, 0% of NaCl (w/v). (Nap, ACY, Ace, FLU, PHE, ANT, FLT, PYR is short for naphthalene, acenaphthylene, acenaphthene, fluorene, phenanthrene, anthracene, fluoranthene, pyrene, respectively.)

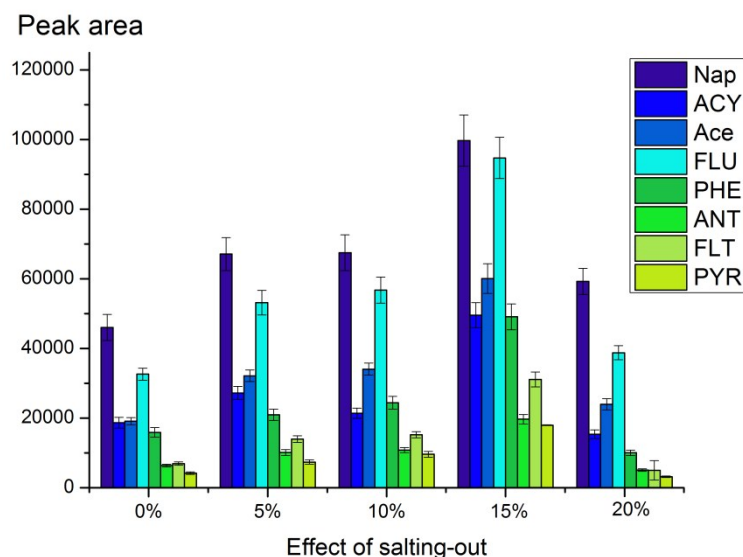

Fig. S4 Effect of salting-out on the extraction of 8 PAHs (n=3). Extraction conditions: extraction solvent (toluene) volume, 80 µL; ultrasound time, 150 s; microwave power, 500 W; microwave time, 30 s. (Nap, ACY, Ace, FLU, PHE, ANT, FLT, PYR is short for naphthalene, acenaphthylene, acenaphthene, fluorene, phenanthrene, anthracene, fluoranthene, pyrene, respectively.)

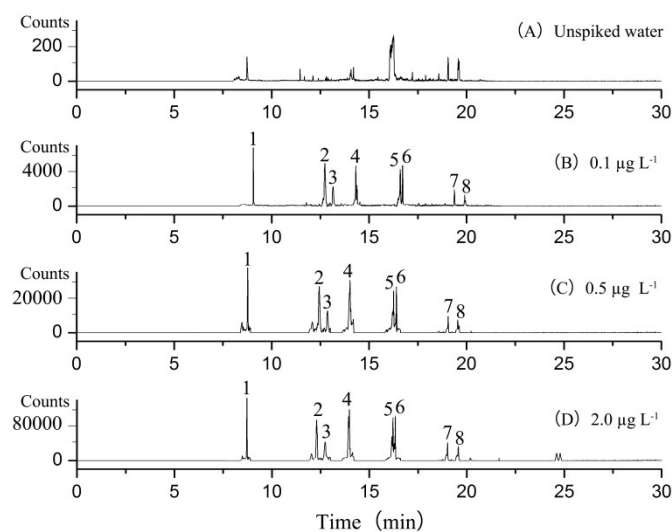

Fig. S5 Total ionic chromatograms of (A) an unspiked water sample; (B) water samples spiked with 0.1  $\mu\text{g/L}$  of each analyte; (C) 0.5  $\mu\text{g/L}$  of each analyte; (D) 2.0  $\mu\text{g/L}$  of each analyte. 1: naphthalene, 2: acenaphthylene, 3: acenaphthene, 4: fluorene, 5: phenanthrene, 6: anthracene, 7: fluoranthene, 8: pyrene.

Table S1. Accuracy and precision of the proposed method in water matrices.

| Analyte        | Spiked level<br>(0.1 $\mu\text{g/L}$ ) |                      | Spiked level<br>(0.5 $\mu\text{g/L}$ ) |                      | Spiked level<br>(2.0 $\mu\text{g/L}$ ) |                      |
|----------------|----------------------------------------|----------------------|----------------------------------------|----------------------|----------------------------------------|----------------------|
|                | R <sup>a</sup> (%)                     | RSD <sup>b</sup> (%) | R <sup>a</sup> (%)                     | RSD <sup>b</sup> (%) | R <sup>a</sup> (%)                     | RSD <sup>b</sup> (%) |
| Naphthalene    | 101.7                                  | 1.6                  | 100.6                                  | 1.5                  | 100.4                                  | 3.0                  |
| Acenaphthylene | 105.9                                  | 4.8                  | 98.8                                   | 1.1                  | 99.0                                   | 5.4                  |
| Acenaphthene   | 100.5                                  | 1.5                  | 98.4                                   | 2.3                  | 101.9                                  | 6.7                  |
| Fluorene       | 100.9                                  | 5.8                  | 98.3                                   | 1.6                  | 100.3                                  | 2.6                  |
| Phenanthrene   | 94.6                                   | 5.2                  | 100.2                                  | 2.4                  | 100.9                                  | 1.2                  |
| Anthracene     | 98.6                                   | 1.4                  | 98.3                                   | 2.0                  | 102.5                                  | 5.3                  |
| Fluoranthene   | 97.6                                   | 1.1                  | 102.0                                  | 5.4                  | 100.8                                  | 2.0                  |
| Pyrene         | 102.2                                  | 2.6                  | 101.4                                  | 5.1                  | 98.8                                   | 1.4                  |

<sup>a</sup> Recovery. <sup>b</sup> Relative standard deviation ( $n=5$ ).
